# Supplementary material for: Genetic Insights into Biofilm Formation by a Pathogenic Strain of Vibrio harveyi
Source: MDPI journal article supplement (doi:10.3390/microorganisms12010186), 2024-01-17
Supplement: s1 [file s1]

**Table S1.** Expression of genes involved in motility and attachment in *V. harveyi* ORM4 biofilm cells (adjusted *p*-value < 0.05).

| <i>Vibrio harveyi</i> ORM4<br>gene ID | Gene<br>Name | FC     | Log <sub>2</sub> FC | Product                                                  |
|---------------------------------------|--------------|--------|---------------------|----------------------------------------------------------|
| HORM4_180020                          | <i>flgN</i>  | 0.424  | -1,2                | Flagellar biosynthesis protein FlgN                      |
| HORM4_180021                          | <i>flgM</i>  | 0.27   | -1,9                | Negative regulator of flagellin synthesis FlgM           |
| HORM4_180023                          | <i>cheV</i>  | 0.445  | -1,2                | Chemotaxis protein CheV                                  |
| HORM4_180026                          | <i>flgB</i>  | 0.166  | -2,6                | Flagellar basal body rod protein FlgB                    |
| HORM4_180027                          | <i>flgC</i>  | 0.206  | -2,3                | Flagellar basal body rod protein FlgC                    |
| HORM4_180028                          | <i>flgD</i>  | 0.336  | -1,6                | Flagellar basal body rod modification protein FlgD       |
| HORM4_180029                          | <i>flgE</i>  | 0.29   | -1,8                | Flagellar hook protein FlgE                              |
| HORM4_180037                          | <i>flaC</i>  | 0.373  | -1,4                | Flagellin protein FlaC                                   |
| HORM4_180038                          | <i>flaD</i>  | 0.315  | -1,7                | Flagellin protein FlaD                                   |
| HORM4_460050                          | <i>flaA</i>  | 0.236  | -2,1                | Flagellin protein FlaA                                   |
| HORM4_460051                          | <i>flaG</i>  | 0.16   | -2,6                | Flagellar protein FlaG                                   |
| HORM4_460052                          | <i>fliD</i>  | 0.342  | -1,5                | Flagellar hook-associated protein FliD                   |
| HORM4_460054                          | <i>fliS</i>  | 0.492  | -1,0                | Flagellar secretion chaperone FliS                       |
| HORM4_170051                          | <i>motA</i>  | 0.303  | -1,7                | Flagellar motor rotation protein MotA                    |
| HORM4_170052                          | <i>motB</i>  | 0.346  | -1,5                | Flagellar motor rotation protein MotB                    |
| HORM4_510008                          | <i>motY</i>  | 0.528  | -0,9                | Sodium-type flagellar protein MotY precursor             |
| HORM4_1020003                         | <i>flgK</i>  | 2.785  | 1,5                 | Flagellar hook-associated protein FlgK                   |
| HORM4_1020004                         | <i>flgJ</i>  | 3.524  | 1,8                 | Peptidoglycan hydrolase FlgJ                             |
| HORM4_1020005                         | <i>flgI</i>  | 3.529  | 1,8                 | Flagellar P-ring protein FlgI                            |
| HORM4_1020006                         | <i>flgH</i>  | 6.099  | 2,6                 | Flagellar L-ring protein FlgH                            |
| HORM4_1020007                         | <i>flgG</i>  | 4.624  | 2,2                 | Flagellar basal body rod protein FlgG                    |
| HORM4_1020008                         | <i>flgF</i>  | 6.017  | 2,6                 | Flagellar basal body rod protein FlgF                    |
| HORM4_1020009                         | <i>flgE</i>  | 7.182  | 2,8                 | Flagellar hook protein FlgE                              |
| HORM4_1020010                         | <i>flgD</i>  | 6.211  | 2,6                 | Flagellar basal body rod modification protein FlgD       |
| HORM4_1020011                         | <i>flgC</i>  | 6.328  | 2,7                 | Flagellar basal body rod protein FlgC                    |
| HORM4_1020012                         | <i>flgB</i>  | 16.766 | 4,1                 | Flagellar basal body rod protein FlgB                    |
| HORM4_970028                          | <i>fliJ</i>  | 3.437  | 1,8                 | Flagellar export protein FliJ                            |
| HORM4_970029                          | <i>fliI</i>  | 3.184  | 1,7                 | Flagellum-specific ATP synthase FliI                     |
| HORM4_970030                          | <i>fliH</i>  | 5.9    | 2,6                 | Flagellar assembly protein FliH                          |
| HORM4_970031                          | <i>fliG</i>  | 10.341 | 3,4                 | Flagellar motor switch protein FliG                      |
| HORM4_970032                          | <i>fliF</i>  | 9.928  | 3,3                 | Flagellar M-ring protein FliF                            |
| HORM4_970033                          | <i>fliE</i>  | 6.046  | 2,6                 | Flagellar hook-basal body complex protein FliE           |
| HORM4_970034                          | <i>lafK</i>  | 5.743  | 2,5                 | Sigma-54 dependent transcriptional regulator LafK        |
| HORM4_970035                          | <i>motY</i>  | 5.752  | 2,5                 | Component of sodium-driven polar flagellar motor<br>MotY |
| HORM4_970037                          | <i>fliM</i>  | 11.904 | 3,6                 | Flagellar motor switch protein FliM                      |
| HORM4_970038                          | <i>fliN</i>  | 8.238  | 3,0                 | Flagellar motor switch protein FliN                      |
| HORM4_970039                          | <i>fliP</i>  | 8.843  | 3,1                 | Flagellar biosynthesis protein FliP                      |
| HORM4_970040                          | <i>fliQ</i>  | 5.388  | 2,4                 | Flagellar biosynthesis protein FliQ                      |
| HORM4_970041                          | <i>fliR</i>  | 4.438  | 2,2                 | Flagellar biosynthesis protein FliR                      |
| HORM4_970044                          |              | 3.666  | 1,9                 | Conserved protein of unknown function                    |
| HORM4_970045                          | <i>lafA</i>  | 3.34   | 1,7                 | Lateral flagellin LafA                                   |
| HORM4_980002                          | <i>fliS</i>  | 3.493  | 1,8                 | Flagellar secretion chaperone fliS                       |
| HORM4_980004                          | <i>fliK</i>  | 5.265  | 2,4                 | Flagellar hook-length control protein FliK               |
| HORM4_980005                          | <i>fliL</i>  | 6.452  | 2,7                 | Flagellar basal body-associated protein FliL             |

|              |             |        |        |                                                                                  |
|--------------|-------------|--------|--------|----------------------------------------------------------------------------------|
| HORM4_980006 | <i>fliA</i> | 2.412  | 1,3    | RNA polymerase sigma factor for flagellar operon<br>FliA                         |
| HORM4_980007 | <i>motA</i> | 2.576  | 1,4    | Flagellar motor rotation protein MotA                                            |
| HORM4_700005 | <i>flp</i>  | 29.13  | 4,9    | Flp pilus assembly protein, pilin Flp                                            |
| HORM4_700006 | <i>tadV</i> | 52.965 | 5,7    | Type IV prepilin peptidase TadV                                                  |
| HORM4_700007 | <i>cpaB</i> | 21.33  | 4,4    | Flp pilus assembly protein CpaB                                                  |
| HORM4_700008 | <i>cpaC</i> | 20.681 | 4,4    | Type II/IV secretion system secretin CpaC,<br>associated with Flp pilus assembly |
| HORM4_700009 |             | 37.605 | 5,2    | Conserved exported protein of unknown function                                   |
| HORM4_700010 |             | 23.155 | 4,5    | Conserved protein of unknown function                                            |
| HORM4_700011 | <i>tadA</i> | 18.403 | 4,2    | TadA type II/IV secretion system ATP hydrolase                                   |
| HORM4_700012 | <i>tadB</i> | 20.76  | 4,4    | Flp pilus assembly protein TadB                                                  |
| HORM4_700013 | <i>tadC</i> | 20.825 | 4,4    | Type II/IV secretion system protein TadC,<br>associated with Flp pilus assembly  |
| HORM4_700014 | <i>tadD</i> | 24.047 | 4,6    | Flp pilus assembly protein TadD                                                  |
| HORM4_700015 |             | 23.852 | 4,6    | TadE-like protein                                                                |
| HORM4_700016 |             | 11.177 | 3,5    | Conserved protein of unknown function                                            |
| HORM4_700017 |             | 21.176 | 4,4    | Conserved protein of unknown function                                            |
| HORM4_920006 | <i>papC</i> | 0.026  | -5,2   | P pilus assembly protein, porin PapC                                             |
| HORM4_920007 | <i>papD</i> | 0.014  | -6,2   | P pilus assembly protein, chaperone PapD                                         |
| HORM4_370020 | <i>mshA</i> | 0.289  | -1,793 | MSHA pilin protein MshA                                                          |

**Table S2.** *V. harveyi* ORM4 Tad proteins and amino acidic percentage of identity with Tad proteins of *V. vulnificus* CMCP6.

| <i>Vibrio harveyi</i> ORM4<br>gene ID | % aa identity | <i>Vibrio vulnificus</i> CMCP6<br>gene ID | <i>Vibrio vulnificus</i> CMCP6<br>protein |
|---------------------------------------|---------------|-------------------------------------------|-------------------------------------------|
| HORM4_700005                          | 41,5          | vv1_3224                                  | Flp                                       |
| HORM4_700006                          | 29,5          | vv1_2329                                  | TadV                                      |
| HORM4_700007                          | 23,64         | vv1_2330                                  | RcpC                                      |
| HORM4_700008                          | 31,14         | vv1_2331                                  | RcpA                                      |
| HORM4_700011                          | 51,8          | vv1_2334                                  | TadA                                      |
| HORM4_700012                          | 30,2          | vv1_2335                                  | TadB                                      |
| HORM4_700013                          | 24,9          | vv1_2336                                  | TadC                                      |
| HORM4_700014                          | 22,9          | vv1_2337                                  | TadD                                      |
| HORM4_610121                          | 46,2          | vv2_0084                                  | Flp                                       |
| HORM4_610122                          | 44,6          | vv2_0085                                  | RcpC                                      |
| HORM4_610123                          | 71,9          | vv2_0086                                  | RcpA                                      |
| HORM4_610124                          | 32,2          | vv2_0087                                  | RcpB                                      |
| HORM4_610125                          | 56,2          | vv2_0088                                  | TadZ                                      |
| HORM4_610126                          | 86            | vv2_0089                                  | TadA                                      |
| HORM4_610127                          | 63,3          | vv2_0090                                  | TadB                                      |
| HORM4_610128                          | 56,6          | vv2_0091                                  | TadC                                      |
| HORM4_610129                          | 53,7          | vv2_0092                                  | TadD                                      |
| HORM4_610130                          | 42,8          | vv2_0093                                  | TadE                                      |
| HORM4_610131                          | 47,9          | vv2_0094                                  | TadF                                      |
| HORM4_610132                          | 48,4          | vv2_0095                                  | TadG                                      |
| HORM4_430096                          | 48,1          | vv1AM_1569                                | Flp-a                                     |

|              |      |          |         |
|--------------|------|----------|---------|
| HORM4_430098 | 34,1 | vv1_1746 | TadV    |
| HORM4_430099 | 62,4 | vv1_1747 | ATP-ase |
| HORM4_430100 | 61,5 | vv1_1748 | RcpC    |
| HORM4_430101 | 70,8 | vv1_1749 | RcpA    |
| HORM4_430102 | 49,3 | vv1_1750 | RcpB    |
| HORM4_430103 | 53,8 | vv1_1754 | TadG    |
| HORM4_430104 | 75,6 | vv1_1755 | TadA    |
| HORM4_430105 | 57,6 | vv1_1756 | TadB    |
| HORM4_430107 | 55,8 | vv1_1757 | TadC    |
| HORM4_430108 | 55,2 | vv1_1758 | TadD    |

**Table S3.** *V. harveyi* ORM4 CPS proteins and amino acidic percentage of identity with CPS proteins of *V. parahaemolyticus* RIMD2210633.

| <i>Vibrio harveyi</i> ORM4 gene ID | % aa identity | <i>Vibrio parahaemolyticus</i> RIMD2210633 gene ID | <i>Vibrio parahaemolyticus</i> RIMD2210633 protein |
|------------------------------------|---------------|----------------------------------------------------|----------------------------------------------------|
| HORM4_940043                       | 86.27         | vpa1403                                            | CpsA                                               |
| HORM4_940044                       | 71.32         | vpa1404                                            | CpsB                                               |
| HORM4_940045                       | 89.83         | vpa1405                                            | CpsC                                               |
| HORM4_940046                       | 85.53         | vpa1406                                            | CpsD                                               |
| HORM4_940047                       | 71            | vpa1407                                            | CpsE                                               |
| HORM4_940048                       | 78.57         | vpa1408                                            | CpsF                                               |
| HORM4_940049                       | 73.12         | vpa1409                                            | CpsG                                               |
| HORM4_940050                       | 86.96         | vpa1410                                            | CpsH                                               |
| HORM4_940052                       | 76.38         | vpa1411                                            | CpsI                                               |
| HORM4_940053                       | 67.36         | vpa1412                                            | CpsJ                                               |
| HORM4_940054                       | 72.8          | vpa1413                                            | CpsK                                               |

**Table S4.** Expression of genes associated to the *cps* cluster in *V. harveyi* ORM4 biofilm cells.

| <i>Vibrio harveyi</i> ORM4 gene ID | FC    | Log <sub>2</sub> FC | Adjusted <i>p</i> -value |
|------------------------------------|-------|---------------------|--------------------------|
| HORM4_940043                       | 2.192 | 1.132               | 0.05                     |
| HORM4_940044                       | 1.503 | 0.588               | 0.3                      |
| HORM4_940045                       | 1.463 | 0.549               | 0.32                     |
| HORM4_940046                       | 1.33  | 0.412               | 0.51                     |
| HORM4_940047                       | 0.946 | -0.08               | 0.89                     |
| HORM4_940048                       | 1.198 | 0.26                | 0.62                     |
| HORM4_940049                       | 1.107 | 0.147               | 0.8                      |
| HORM4_940050                       | 1.486 | 0.572               | 0.22                     |
| HORM4_940052                       | 1.382 | 0.467               | 0.4                      |
| HORM4_940053                       | 1.431 | 0.517               | 0.30                     |
| HORM4_940054                       | 1.636 | 0.71                | 0.15                     |
